# Supplementary material
Source: Springer Nature journal article supplement (https://www.springermedizin.de/resource/supplementary/12865_2013_538_MOESM4_ESM.pdf/9428170)

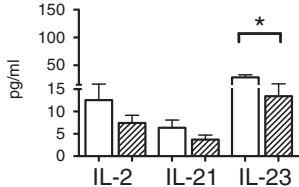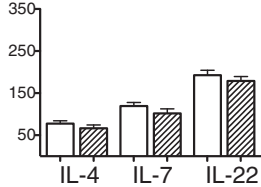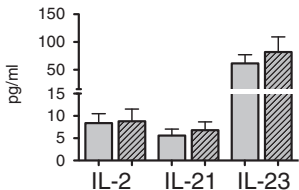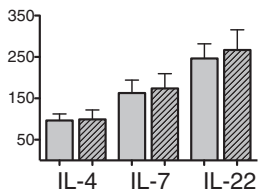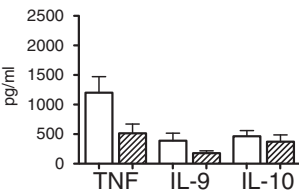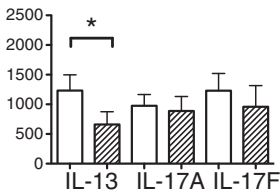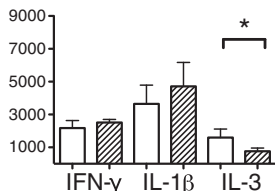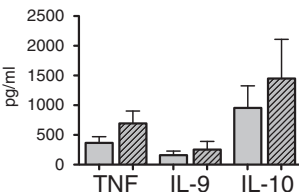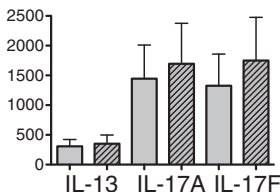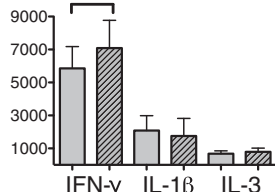

Supplement: MOESM4 [file 9428170]
